# Exercise Training Improves Glycemic Control in Long-Standing Insulin-Treated Type 2 Diabetic Patients

HENK M. DE FEYTER, PHD<sup>1</sup>  
STEPHAN F. PRAET, MD<sup>2</sup>  
NICOLE M. VAN DEN BROEK, MSC<sup>1</sup>  
HARM KUIPERS, MD, PHD<sup>2</sup>

COEN D. STEHOUWER, MD, PHD<sup>3</sup>  
KLAAS NICOLAY, PHD<sup>1</sup>  
JEANINE J. PROMPERS, PHD<sup>1</sup>  
LUC J.C. VAN LOON, PHD<sup>2</sup>

Regular exercise represents an effective strategy to prevent and/or treat type 2 diabetes (1,2). However, the clinical benefits of exercise intervention in a vastly expanding group of long-standing insulin-treated type 2 diabetic patients with comorbidities are less evident. As these patients generally experience muscle weakness (3–6), cardiovascular comorbidities (7–10), and/or exercise intolerance (3,11–13), it has proven difficult or even impossible for them to adhere to an intense endurance exercise training regimen (14,15). In the present study, we investigated the feasibility and benefits of a low-impact exercise intervention program, combining both endurance and resistance-type exercise, in long-standing insulin-treated type 2 diabetic patients with a high cardiovascular risk profile. We assessed the impact of 5 months of exercise training on glycemic control, body composition, workload capacity, and whole-body as well as skeletal muscle oxidative capacity.

## RESEARCH DESIGN AND METHODS

A total of 11 male type 2 diabetic patients volunteered to participate in this study. Participants (aged  $59 \pm 3$  years, BMI  $32 \pm 1$  kg/m<sup>2</sup>) had been diagnosed with type 2 diabetes for  $12 \pm 2$  years and had been on exogenous

insulin treatment for  $7 \pm 2$  years (insulin requirements  $93 \pm 11$  units/day). All participants were sedentary and showed a high cardiovascular risk profile (with a 10-year risk for coronary heart disease of  $30 \pm 2\%$  according to the UK Prospective Diabetes Study [UKPDS] [16]). Participants had been on a stable regimen of diabetes medication for at least 3 months before recruitment. Type 2 diabetic patients using thiazolidinediones and/or  $\beta$ -blockers <6 months and participants with impaired liver function, macroalbuminuria, severe retinopathy, or cardiovascular problems were excluded.

Before and after the 5-month exercise program, body composition (dual-energy X-ray absorptiometry), upper-leg muscle volume (magnetic resonance [MR] imaging), glycemic control, blood lipid profile, blood pressure, whole-body oxygen uptake and maximal workload capacity, intramyocellular lipid content, and skeletal muscle oxidative capacity were assessed. Plasma glucose, A1C, serum cholesterol, HDL cholesterol, nonesterified fatty acid, triacylglycerol, adiponectin, tumor necrosis factor- $\alpha$ , high-sensitivity C-reactive protein, and C-peptide concentrations were determined in fasting blood samples. Blood pressure was recorded during supine rest using an automatic blood pressure-measuring device. Mean arterial

blood pressure was calculated from the last three stable blood pressure measurements over a 10-min period. Blood pressure-lowering medications were not changed throughout the study. Whole-body oxygen uptake capacity ( $V_{O_{2max}}$ ) and maximal workload capacity ( $W_{max}$ ) were measured during an incremental exercise test to exhaustion. MR spectroscopy (MRS) measurements were performed using a 1.5-Tesla whole-body MR scanner. Localized <sup>1</sup>H-MRS was used to measure intramyocellular lipid content in the musculus vastus lateralis. <sup>31</sup>P-MRS was applied to measure postexercise phosphocreatine (PCr) recovery, as previously described (17). Results are expressed as the time constant of recovery for PCr and ADP, i.e.,  $\tau_{PCr}$  and  $\tau_{ADP}$ , representing skeletal muscle oxidative capacity (18).

The backbone of the exercise program was progressive resistance training (PRT), with high-intensity interval training (HIT) as a supplement. Four bouts of resistance-type exercise targeting the upper body were performed ( $2 \times 10$  repetitions, 50% of 1 repetition max [1RM] [19]). Thereafter, resistance training was continued with horizontal leg press and leg extension ( $2 \times 10$  repetitions). Throughout the PRT, intensity was progressively increased from 50 to 80% 1RM. In each session, PRT was followed by multiple bouts of HIT to stress working leg muscle without overloading the cardiovascular system (20). Both the number of bouts and work rate for the interval modes were progressively increased. The HIT included four to eight cycling bouts of 30/60 s at 50–60%  $W_{max}$  (20). Exercise sessions required  $\sim 45$  min to complete and were performed three times a week. All data are presented as means  $\pm$  SE. Paired-samples *t* tests (two sided) were applied to evaluate changes following exercise intervention, and statistical significance was set at  $P \leq 0.05$ .

**RESULTS**— All participants completed the exercise training program and showed an  $83 \pm 4\%$  attendance rate for the supervised training sessions. Exercise

From the <sup>1</sup>Department of Biomedical NMR, Eindhoven University of Technology, Eindhoven, the Netherlands; the <sup>2</sup>Department of Movement Sciences, NUTRIM, Maastricht University, Maastricht, the Netherlands; and the <sup>3</sup>Department of Internal Medicine, Academic Hospital Maastricht, Maastricht, the Netherlands.

Address correspondence and reprint requests to L.J.C. van Loon, Department of Movement Sciences, Maastricht University, P.O. Box 616, 6200 MD Maastricht, Netherlands. E-mail: l.vanloon@hb.unimaas.nl. Received for publication 30 January 2007 and accepted in revised form 4 July 2007.

Published ahead of print at <http://care.diabetesjournals.org> on 12 July 2007. DOI: 10.2337/dc07-0183.

**Abbreviations:** 1RM, 1 repetition max; HIT, high-intensity interval training; MR, magnetic resonance; MRS, MR spectroscopy; PCr, phosphocreatine; PRT, progressive resistance training.

A table elsewhere in this issue shows conventional and Système International (SI) units and conversion factors for many substances.

© 2007 by the American Diabetes Association.

The costs of publication of this article were defrayed in part by the payment of page charges. This article must therefore be hereby marked "advertisement" in accordance with 18 U.S.C. Section 1734 solely to indicate this fact.

Table 1—Body composition, muscle and whole-body oxidative capacity, functional performance, and blood plasma analyses

|                                                                           | Before training | After training | P     |
|---------------------------------------------------------------------------|-----------------|----------------|-------|
| Body mass (kg)                                                            | 97.5 ± 4.9      | 97.5 ± 4.8     | 0.95  |
| Waist circumference (cm)                                                  | 112.6 ± 3.7     | 113.2 ± 4.0    | 0.7   |
| Total body fat (%)                                                        | 27.0 ± 0.8      | 25.9 ± 0.9     | 0.09  |
| Truncal fat (%)                                                           | 30.1 ± 1.1      | 28.8 ± 1.3     | 0.04  |
| Total body lean mass (kg)                                                 | 68.9 ± 2.9      | 69.6 ± 2.7     | 0.25  |
| Leg lean muscle mass (kg)                                                 | 20.6 ± 1.0      | 21.2 ± 0.9     | 0.03  |
| MRI total muscle (cm <sup>3</sup> )*                                      | 3553 ± 173      | 3653 ± 153     | 0.08  |
| MRI musculus vastus lateralis (cm <sup>3</sup> )†                         | 499 ± 28        | 536 ± 81       | 0.01  |
| Fasting plasma glucose (mmol/l)                                           | 10.4 ± 0.9      | 8.6 ± 0.7      | 0.05  |
| A1C (%)                                                                   | 7.6 ± 0.3       | 7.2 ± 0.2      | 0.04  |
| Daily insulin requirement (units)                                         | 92.5 ± 11.1     | 85.4 ± 12.3    | 0.26  |
| Vo <sub>2max</sub> (ml · min <sup>-1</sup> · kg body mass <sup>-1</sup> ) | 24.3 ± 1.4      | 24.2 ± 1.5     | 0.87  |
| W <sub>max</sub> (W/kg body mass)‡                                        | 1.6 ± 0.1       | 1.9 ± 0.2      | <0.01 |
| Average 1RM§                                                              | 77 ± 4          | 90 ± 6         | <0.01 |
| Intramyocellular lipids (percentage of water signal)                      | 1.9 ± 0.2       | 2.0 ± 0.3      | 0.15  |
| τ <sub>PCr</sub> (s)                                                      | 49.4 ± 5.5      | 45.6 ± 5.6     | 0.09  |
| τ <sub>ADP</sub> (s)                                                      | 22.5 ± 2.9      | 21.2 ± 2.4     | 0.43  |
| Mean arterial pressure (mmHg)                                             | 105.8 ± 2.3     | 98.1 ± 3.1     | 0.02  |
| Mean systolic blood pressure (mmHg)                                       | 147.4 ± 3.7     | 137.9 ± 5.1    | 0.06  |
| Mean diastolic blood pressure (mmHg)                                      | 82.5 ± 2.1      | 78.3 ± 2.4     | 0.13  |
| Total cholesterol (mmol/l)                                                | 4.24 ± 0.17     | 4.37 ± 0.24    | 0.55  |
| HDL cholesterol (mmol/l)                                                  | 0.87 ± 0.07     | 0.91 ± 0.07    | 0.55  |
| LDL cholesterol (mmol/l)                                                  | 3.44 ± 0.13     | 3.53 ± 0.21    | 0.57  |
| Triacylglycerol (mmol/l)                                                  | 2.31 ± 4.26     | 2.26 ± 3.31    | 0.86  |
| Nonesterified fatty acid (mmol/l)                                         | 0.459 ± 0.073   | 0.367 ± 0.044  | 0.07  |
| Adiponectin (μg/l)                                                        | 5.43 ± 0.78     | 5.47 ± 0.82    | 0.9   |
| Tumor necrosis factor-α (ng/l)                                            | 7.19 ± 0.46     | 7.06 ± 0.47    | 0.74  |
| High-sensitivity C-reactive protein (mg/l)                                | 2.1 ± 0.6       | 2.08 ± 0.5     | 0.4   |
| C-peptide (nmol/l)                                                        | 0.94 ± 0.14     | 0.90 ± 0.12    | 0.7   |

Data are means ± SE. n = 11. \*Volume measurements based on MRI data for total upper-leg muscle compartment. †Volume measurements based on MRI data for musculus vastus lateralis. ‡Maximal power output on cycle ergometer. §Average weight lifted in 1RM tests from five different resistance exercises.

training resulted in a decline in truncal fat mass and an increase in lean leg muscle mass (Table 1). Glycemic control improved, with a significant decline in both fasting blood glucose concentration and A1C (from 7.6 ± 0.3 to 7.2 ± 0.2%). Exogenous insulin requirements did not change throughout the training program. When calculating the slope of daily insulin requirement over time, it changed from on average +6.69 units per 6 months in the 3 years before intervention to -1.6 units per 6 months (P < 0.01) following the beginning of the program. Mean arterial blood pressure declined from 106 ± 2 to 98 ± 3 mmHg, and systolic pressure tended to decrease from 147 ± 4 to 138 ± 5 mmHg (P = 0.06). Both maximal power output (1.6 ± 0.1 to 1.9 ± 0.2 W/kg body mass, P < 0.01) and muscle strength (1RM of five exercises: 77 ± 4 to 90 ± 6 kg, P < 0.01) increased significantly. No changes were observed in the lipid profile or in the inflammation markers.

**CONCLUSIONS**— A combination of low-impact endurance and resistance-type exercise training is preferred for long-standing insulin-treated type 2 diabetic patients, as it provides a relatively low cardiovascular challenge (21) and improves functional performance (22,23). The present study shows that such an exercise regimen is well tolerated, with all patients being able to complete the program. Combined endurance and resistance-type exercise training effectively improves glycemic control, body composition, blood pressure, muscle strength, and workload capacity and attenuates the progressive increase in exogenous insulin requirements. Although selection bias and sample size should be acknowledged when generalizing the outcome of this study, we conclude that low-impact endurance and resistance-type exercise training should be prescribed in the vastly expanding population of long-standing insulin-treated type 2 diabetic patients.

## References

1. Sigal RJ, Kenny GP, Wasserman DH, Castaneda-Sceppa C, White RD: Physical activity/exercise and type 2 diabetes: a consensus statement from the American Diabetes Association (Consensus Statement). *Diabetes Care* 29:1433–1438, 2006
2. Sigal RJ, Kenny GP, Wasserman DH, Castaneda-Sceppa C: Physical activity/exercise and type 2 diabetes. *Diabetes Care* 27: 2518–2539, 2004
3. Sayer AA, Dennison EM, Syddall HE, Gilbody HJ, Phillips DI, Cooper C: Type 2 diabetes, muscle strength, and impaired physical function: the tip of the iceberg? *Diabetes Care* 28:2541–2542, 2005
4. Andersen H, Nielsen S, Mogensen CE, Jakobsen J: Muscle strength in type 2 diabetes. *Diabetes* 53:1543–1548, 2004
5. Volpato S, Blaum C, Resnick H, Ferrucci L, Fried LP, Guralnik JM: Comorbidities and impairments explaining the association between diabetes and lower extremity disability: the Women's Health and Aging Study. *Diabetes Care* 25:678–683, 2002

6. Petrofsky JS, Stewart B, Patterson C, Cole M, Al Maly A, Lee S: Cardiovascular responses and endurance during isometric exercise in patients with type 2 diabetes compared to control subjects. *Med Sci Monit* 11:CR470–CR477, 2005
7. Wackers FJ, Young LH, Inzucchi SE, Chyun DA, Davey JA, Barrett EJ, Taillefer R, Wittlin SD, Heller GV, Filipchuk N, Engel S, Ratner RE, Iskandrian AE: Detection of silent myocardial ischemia in asymptomatic diabetic subjects: the DIAD study. *Diabetes Care* 27:1954–1961, 2004
8. Zabalgoitia M, Ismaeil MF, Anderson L, Maklady FA: Prevalence of diastolic dysfunction in normotensive, asymptomatic patients with well-controlled type 2 diabetes mellitus. *Am J Cardiol* 87:320–323, 2001
9. Gazzaruso C, Giordanetti S, De Amici E, Bertone G, Falcone C, Geroldi D, Fratino P, Solerte SB, Garzaniti A: Relationship between erectile dysfunction and silent myocardial ischemia in apparently uncomplicated type 2 diabetic patients. *Circulation* 110:22–26, 2004
10. Spijkerman AM, Dekker JM, Nijpels G, Adriaanse MC, Kostense PJ, Ruwaard D, Stehouwer CD, Bouter LM, Heine RJ: Microvascular complications at time of diagnosis of type 2 diabetes are similar among diabetic patients detected by targeted screening and patients newly diagnosed in general practice: the Hoorn Screening Study. *Diabetes Care* 26:2604–2608, 2003
11. De Rekeneire N, Resnick HE, Schwartz AV, Shorr RI, Kuller LH, Simonsick EM, Vellas B, Harris TB: Diabetes is associated with subclinical functional limitation in nondisabled older individuals: the Health, Aging, and Body Composition study. *Diabetes Care* 26:3257–3263, 2003
12. Boule NG, Kenny GP, Haddad E, Wells GA, Sigal RJ: Meta-analysis of the effect of structured exercise training on cardiorespiratory fitness in type 2 diabetes mellitus. *Diabetologia* 46:1071–1081, 2003
13. Fang ZY, Sharman J, Prins JB, Marwick TH: Determinants of exercise capacity in patients with type 2 diabetes. *Diabetes Care* 28:1643–1648, 2005
14. Schneider SH, Khachadurian AK, Amorosa LF, Clemow L, Ruderman NB: Ten-year experience with an exercise-based outpatient lifestyle modification program in the treatment of diabetes mellitus. *Diabetes Care* 15:1800–1810, 1992
15. Dunstan DW, Daly RM, Owen N, Jolley D, Vulikh E, Shaw J, Zimmet P: Home-based resistance training is not sufficient to maintain improved glycemic control following supervised training in older individuals with type 2 diabetes. *Diabetes Care* 28:3–9, 2005
16. Clarke PM, Gray AM, Briggs A, Farmer AJ, Fenn P, Stevens RJ, Matthews DR, Stratton IM, Holman RR: A model to estimate the lifetime health outcomes of patients with type 2 diabetes: the United Kingdom Prospective Diabetes Study (UKPDS) Outcomes Model (UKPDS no. 68). *Diabetologia* 47:1747–1759, 2004
17. Praet SF, Feyter HM, Jonkers RA, Nicolay K, Pul C, Kuipers H, Loon LJ, Prompers JJ: (31)P MR spectroscopy and in vitro markers of oxidative capacity in type 2 diabetes patients. *Magn Reson Mater Phys* 19:321–331, 2006
18. Arnold DL, Matthews PM, Radda GK: Metabolic recovery after exercise and the assessment of mitochondrial function in vivo in human skeletal muscle by means of 31P NMR. *Magn Reson Med* 1:307–315, 1984
19. Reynolds JM, Gordon TJ, Robergs RA: Prediction of one repetition maximum strength from multiple repetition maximum testing and anthropometry. *J Strength Cond Res* 20:584–592, 2006
20. Meyer K, Samek L, Schwaibold M, Westbrook S, Hajric R, Lehmann M, Essfeld D, Roskamm H: Physical responses to different modes of interval exercise in patients with chronic heart failure—application to exercise training. *Eur Heart J* 17:1040–1047, 1996
21. Meyer K, Lehmann M, Sunder G, Keul J, Weidemann H: Interval versus continuous exercise training after coronary bypass surgery: a comparison of training-induced acute reactions with respect to the effectiveness of the exercise methods. *Clin Cardiol* 13:851–861, 1990
22. Eves ND, Plotnikoff RC: Resistance training and type 2 diabetes: considerations for implementation at the population level. *Diabetes Care* 29:1933–1941, 2006
23. Willey KA, Singh MAF: Battling insulin resistance in elderly obese people with type 2 diabetes: bring on the heavy weights. *Diabetes Care* 26:1580–1588, 2003
